# Supplementary material
Source: ML conference proceedings conference paper supplement (https://proceedings.neurips.cc/paper_files/paper/2017/hash/3937230de3c8041e4da6ac3246a888e8-Abstract.html)

## Supplement

### Typical learning curves for the Omniglot One-Shot task

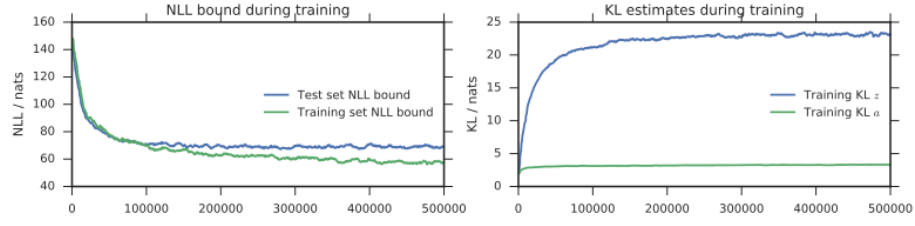

### Approximate posterior inference for Omniglot

#### Memory content

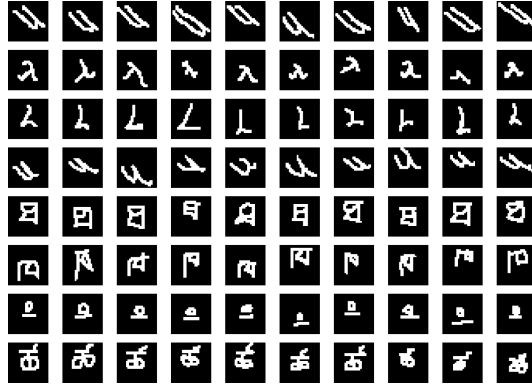

#### Inference with $q(a|x)$ example:

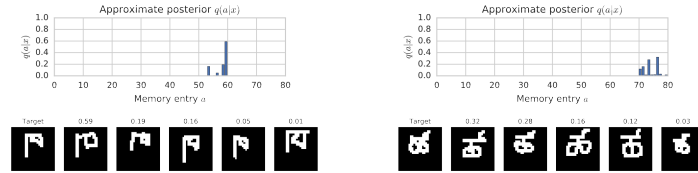

#### Inference with $q(a|x)$ example (incorrect):

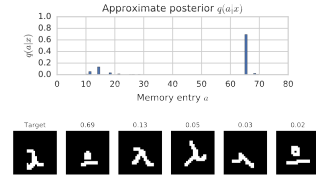

#### Inference with $q(a|x)$ when target is not in memory:

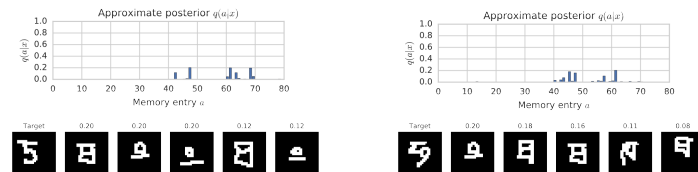

## One-shot samples

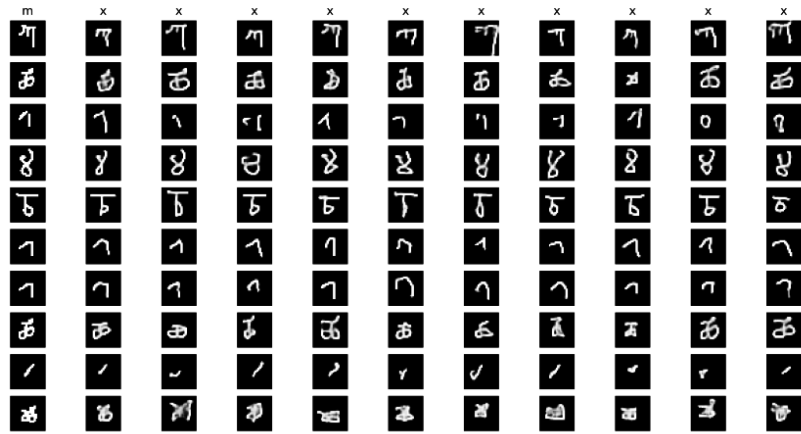

Supplement: Supplementary file [file 3937230de3c8041e4da6ac3246a888e8-Supplemental.zip]
